# Supplementary material for: Cyber-victimization and its association with depression among Vietnamese adolescents
Source: PeerJ journal article supplement (doi:10.7717/peerj.12907), 2022-02-09
Supplement: Questionnaire.pdf [file Questionnaire.pdf]

## English version

The following questions ask about your experiences of school connectedness, family life, society, mental health, and cyberbullying. This survey is not a test. There are no right or wrong answers. PLEASE DO NOT TELL ANYONE ELSE ABOUT YOUR ANSWERS. WE WILL KEEP YOUR ANSWERS CONFIDENTIAL, AND NO ONE WILL KNOW WHO YOU ARE THROUGH YOUR ANSWERS. Please read each statement, decide your answer, then respond by selecting the one that best matches.

### BACKGROUND INFORMATION

|                                                                                                               |                                                                                                                                                                                                                                                                                                                                                                                                                                                                                                                                                                                        |
|---------------------------------------------------------------------------------------------------------------|----------------------------------------------------------------------------------------------------------------------------------------------------------------------------------------------------------------------------------------------------------------------------------------------------------------------------------------------------------------------------------------------------------------------------------------------------------------------------------------------------------------------------------------------------------------------------------------|
| Your gender                                                                                                   | <input type="checkbox"/> Male <span style="margin-left: 200px;"><input type="checkbox"/> Female</span>                                                                                                                                                                                                                                                                                                                                                                                                                                                                                 |
| Which grade are you in?                                                                                       | <input type="checkbox"/> Grade 8 <input type="checkbox"/> Grade 9 <input type="checkbox"/> Grade 10 <input type="checkbox"/> Grade 11 <input type="checkbox"/> Grade 12                                                                                                                                                                                                                                                                                                                                                                                                                |
| What has been your grade point average in the last semester?                                                  | <input type="checkbox"/> Very below average <input type="checkbox"/> Below average <input type="checkbox"/> Average <input type="checkbox"/> Fairly good <input type="checkbox"/> Good                                                                                                                                                                                                                                                                                                                                                                                                 |
| How often do you access the Internet?                                                                         | <input type="checkbox"/> All of the time <input type="checkbox"/> A little of the time<br><input type="checkbox"/> Several times/week <input type="checkbox"/> None of the time<br><input type="checkbox"/> Several times/month                                                                                                                                                                                                                                                                                                                                                        |
| On average, how many hours per day do you spend on accessing the Internet?                                    | <input type="checkbox"/> <2 hours/day <input type="checkbox"/> 2-4 hours/day <input type="checkbox"/> >4 hours/day                                                                                                                                                                                                                                                                                                                                                                                                                                                                     |
| Where do you usually access the Internet?<br><b>(You can select multiple answers)</b>                         | <input type="checkbox"/> At home in a private room<br><input type="checkbox"/> At home in the living room when no one<br><input type="checkbox"/> At home in the living room when relatives<br><input type="checkbox"/> Public places (coffee shops)<br><input type="checkbox"/> At school during school hours<br><input type="checkbox"/> At school outside of school hours<br><input type="checkbox"/> Other: .....                                                                                                                                                                  |
| Which types of devices do you use to connect to the Internet?<br><br><b>(You can select multiple answers)</b> | <input type="checkbox"/> Mobile phone<br><input type="checkbox"/> Tablet<br><input type="checkbox"/> Shared computer<br><input type="checkbox"/> Personal computer<br><input type="checkbox"/> Other: .....                                                                                                                                                                                                                                                                                                                                                                            |
| What do you usually do on Internet?<br><b>(You can select multiple answers)</b>                               | <input type="checkbox"/> Accessing social networking sites (Facebook, Youtube,...)<br><input type="checkbox"/> Chatting with others<br><input type="checkbox"/> Sending an email<br><input type="checkbox"/> Searching for information<br><input type="checkbox"/> Reading the news<br><input type="checkbox"/> Studying<br><input type="checkbox"/> Listening to music<br><input type="checkbox"/> Watching movies<br><input type="checkbox"/> Shopping<br><input type="checkbox"/> Playing games<br><input type="checkbox"/> Posting photos<br><input type="checkbox"/> Other: ..... |
| Currently, who are you living with?<br><b>(You can select multiple answers)</b>                               | <input type="checkbox"/> Both father and mother<br><input type="checkbox"/> Father or mother<br><input type="checkbox"/> Relatives<br><input type="checkbox"/> Alone<br><input type="checkbox"/> Other: .....                                                                                                                                                                                                                                                                                                                                                                          |

### INTERNET ADDICTION TEST

|                                                                       | Rarely                   | Occasionally             | Frequently               | Often                    | Always                   |
|-----------------------------------------------------------------------|--------------------------|--------------------------|--------------------------|--------------------------|--------------------------|
| How often do you find that you stay on-line longer than you intended? | <input type="checkbox"/> | <input type="checkbox"/> | <input type="checkbox"/> | <input type="checkbox"/> | <input type="checkbox"/> |

|                                                                                                                     |                          |                          |                          |                          |                          |
|---------------------------------------------------------------------------------------------------------------------|--------------------------|--------------------------|--------------------------|--------------------------|--------------------------|
| How often do you neglect household chores to spend more time on-line?                                               | <input type="checkbox"/> | <input type="checkbox"/> | <input type="checkbox"/> | <input type="checkbox"/> | <input type="checkbox"/> |
| How often do you prefer the excitement of the Internet to intimacy with your partner?                               | <input type="checkbox"/> | <input type="checkbox"/> | <input type="checkbox"/> | <input type="checkbox"/> | <input type="checkbox"/> |
| How often do you form new relationships with fellow on-line users?                                                  | <input type="checkbox"/> | <input type="checkbox"/> | <input type="checkbox"/> | <input type="checkbox"/> | <input type="checkbox"/> |
| How often do others in your life complain to you about the amount of time you spend on-line?                        | <input type="checkbox"/> | <input type="checkbox"/> | <input type="checkbox"/> | <input type="checkbox"/> | <input type="checkbox"/> |
| How often do your grades or school work suffers because of the amount of time you spend on-line?                    | <input type="checkbox"/> | <input type="checkbox"/> | <input type="checkbox"/> | <input type="checkbox"/> | <input type="checkbox"/> |
| How often do you check your email before something else that you need to do?                                        | <input type="checkbox"/> | <input type="checkbox"/> | <input type="checkbox"/> | <input type="checkbox"/> | <input type="checkbox"/> |
| How often does your job performance or productivity suffer because of the Internet?                                 | <input type="checkbox"/> | <input type="checkbox"/> | <input type="checkbox"/> | <input type="checkbox"/> | <input type="checkbox"/> |
| How often do you become defensive or secretive when anyone asks you what you do on-line?                            | <input type="checkbox"/> | <input type="checkbox"/> | <input type="checkbox"/> | <input type="checkbox"/> | <input type="checkbox"/> |
| How often do you block out disturbing thoughts about your life with soothing thoughts of the Internet?              | <input type="checkbox"/> | <input type="checkbox"/> | <input type="checkbox"/> | <input type="checkbox"/> | <input type="checkbox"/> |
| How often do you find yourself anticipating when you will go on-line again?                                         | <input type="checkbox"/> | <input type="checkbox"/> | <input type="checkbox"/> | <input type="checkbox"/> | <input type="checkbox"/> |
| How often do you fear that life without the Internet would be boring, empty, and joyless?                           | <input type="checkbox"/> | <input type="checkbox"/> | <input type="checkbox"/> | <input type="checkbox"/> | <input type="checkbox"/> |
| How often do you snap, yell, or act annoyed if someone bothers you while you are on-line?                           | <input type="checkbox"/> | <input type="checkbox"/> | <input type="checkbox"/> | <input type="checkbox"/> | <input type="checkbox"/> |
| How often do you lose sleep due to late-night log-ins?                                                              | <input type="checkbox"/> | <input type="checkbox"/> | <input type="checkbox"/> | <input type="checkbox"/> | <input type="checkbox"/> |
| How often do you feel preoccupied with the Internet when off-line, or fantasize about being on-line?                | <input type="checkbox"/> | <input type="checkbox"/> | <input type="checkbox"/> | <input type="checkbox"/> | <input type="checkbox"/> |
| How often do you find yourself saying "just a few more minutes" when online?                                        | <input type="checkbox"/> | <input type="checkbox"/> | <input type="checkbox"/> | <input type="checkbox"/> | <input type="checkbox"/> |
| How often do you try to cut down the amount of time you spend on-line 1 2 3 4 5 0and fail?                          | <input type="checkbox"/> | <input type="checkbox"/> | <input type="checkbox"/> | <input type="checkbox"/> | <input type="checkbox"/> |
| How often do you try to hide how long you've been on-line?                                                          | <input type="checkbox"/> | <input type="checkbox"/> | <input type="checkbox"/> | <input type="checkbox"/> | <input type="checkbox"/> |
| How often do you choose to spend more time on-line over going out with others?                                      | <input type="checkbox"/> | <input type="checkbox"/> | <input type="checkbox"/> | <input type="checkbox"/> | <input type="checkbox"/> |
| How often do you feel depressed, moody or nervous when you are off-line, which goes away once you are back on-line? | <input type="checkbox"/> | <input type="checkbox"/> | <input type="checkbox"/> | <input type="checkbox"/> | <input type="checkbox"/> |

### PARENTAL BONDING INSTRUMENT

*This questionnaire lists various attitudes and behaviours of mother (natural mother/step mother/adoptive mother) and father (natural father/step father/adoptive father).*

**Note:**

- Do BOTH sections: MOTHER & FATHER if you live with both your father (natural father/step father/adopted father) and your mother (natural mother/stepmother/adoptive mother)
- Do the FATHER section if you are only living with your father (natural father/step father/adoptive father).
- Do the MOTHER section if you only live with your mother (natural mother/step mother/adoptive mother).
- Please go to the next section to answer the questions if you do not live with your father (natural father/step father/adoptive father) and mother (natural mother/step mother/adoptive mother).

| FATHER                   |                          |                          |                          | STATEMENT                                | MOTHER                   |                          |                          |                          |
|--------------------------|--------------------------|--------------------------|--------------------------|------------------------------------------|--------------------------|--------------------------|--------------------------|--------------------------|
| Very like                | Moderately like          | Moderately unlike        | Very unlike              |                                          | Very unlike              | Moderately unlike        | Moderately like          | Very like                |
| <input type="checkbox"/> | <input type="checkbox"/> | <input type="checkbox"/> | <input type="checkbox"/> | Spoke to me in a warm and friendly voice | <input type="checkbox"/> | <input type="checkbox"/> | <input type="checkbox"/> | <input type="checkbox"/> |
| <input type="checkbox"/> | <input type="checkbox"/> | <input type="checkbox"/> | <input type="checkbox"/> | Did not help me as much as I needed      | <input type="checkbox"/> | <input type="checkbox"/> | <input type="checkbox"/> | <input type="checkbox"/> |
| <input type="checkbox"/> | <input type="checkbox"/> | <input type="checkbox"/> | <input type="checkbox"/> | Let me do those things I liked doing     | <input type="checkbox"/> | <input type="checkbox"/> | <input type="checkbox"/> | <input type="checkbox"/> |
| <input type="checkbox"/> | <input type="checkbox"/> | <input type="checkbox"/> | <input type="checkbox"/> | Seemed emotionally cold to me            | <input type="checkbox"/> | <input type="checkbox"/> | <input type="checkbox"/> | <input type="checkbox"/> |

|                          |                          |                          |                          |                                                             |                          |                          |                          |                          |
|--------------------------|--------------------------|--------------------------|--------------------------|-------------------------------------------------------------|--------------------------|--------------------------|--------------------------|--------------------------|
| <input type="checkbox"/> | <input type="checkbox"/> | <input type="checkbox"/> | <input type="checkbox"/> | Appeared to understand my problems and worries              | <input type="checkbox"/> | <input type="checkbox"/> | <input type="checkbox"/> | <input type="checkbox"/> |
| <input type="checkbox"/> | <input type="checkbox"/> | <input type="checkbox"/> | <input type="checkbox"/> | Was affectionate to me                                      | <input type="checkbox"/> | <input type="checkbox"/> | <input type="checkbox"/> | <input type="checkbox"/> |
| <input type="checkbox"/> | <input type="checkbox"/> | <input type="checkbox"/> | <input type="checkbox"/> | Liked me to make my own decisions                           | <input type="checkbox"/> | <input type="checkbox"/> | <input type="checkbox"/> | <input type="checkbox"/> |
| <input type="checkbox"/> | <input type="checkbox"/> | <input type="checkbox"/> | <input type="checkbox"/> | Did not want me to grow up                                  | <input type="checkbox"/> | <input type="checkbox"/> | <input type="checkbox"/> | <input type="checkbox"/> |
| <input type="checkbox"/> | <input type="checkbox"/> | <input type="checkbox"/> | <input type="checkbox"/> | Tried to control everything I did                           | <input type="checkbox"/> | <input type="checkbox"/> | <input type="checkbox"/> | <input type="checkbox"/> |
| <input type="checkbox"/> | <input type="checkbox"/> | <input type="checkbox"/> | <input type="checkbox"/> | Invaded my privacy                                          | <input type="checkbox"/> | <input type="checkbox"/> | <input type="checkbox"/> | <input type="checkbox"/> |
| <input type="checkbox"/> | <input type="checkbox"/> | <input type="checkbox"/> | <input type="checkbox"/> | Enjoyed talking things over with me                         | <input type="checkbox"/> | <input type="checkbox"/> | <input type="checkbox"/> | <input type="checkbox"/> |
| <input type="checkbox"/> | <input type="checkbox"/> | <input type="checkbox"/> | <input type="checkbox"/> | Frequently smiled at me                                     | <input type="checkbox"/> | <input type="checkbox"/> | <input type="checkbox"/> | <input type="checkbox"/> |
| <input type="checkbox"/> | <input type="checkbox"/> | <input type="checkbox"/> | <input type="checkbox"/> | Tended to baby me                                           | <input type="checkbox"/> | <input type="checkbox"/> | <input type="checkbox"/> | <input type="checkbox"/> |
| <input type="checkbox"/> | <input type="checkbox"/> | <input type="checkbox"/> | <input type="checkbox"/> | Did not seem to understand what I needed or wanted          | <input type="checkbox"/> | <input type="checkbox"/> | <input type="checkbox"/> | <input type="checkbox"/> |
| <input type="checkbox"/> | <input type="checkbox"/> | <input type="checkbox"/> | <input type="checkbox"/> | Let me decide things for myself                             | <input type="checkbox"/> | <input type="checkbox"/> | <input type="checkbox"/> | <input type="checkbox"/> |
| <input type="checkbox"/> | <input type="checkbox"/> | <input type="checkbox"/> | <input type="checkbox"/> | Made me feel I wasn't wanted                                | <input type="checkbox"/> | <input type="checkbox"/> | <input type="checkbox"/> | <input type="checkbox"/> |
| <input type="checkbox"/> | <input type="checkbox"/> | <input type="checkbox"/> | <input type="checkbox"/> | Could make me feel better when I was upset                  | <input type="checkbox"/> | <input type="checkbox"/> | <input type="checkbox"/> | <input type="checkbox"/> |
| <input type="checkbox"/> | <input type="checkbox"/> | <input type="checkbox"/> | <input type="checkbox"/> | Did not talk with me very much                              | <input type="checkbox"/> | <input type="checkbox"/> | <input type="checkbox"/> | <input type="checkbox"/> |
| <input type="checkbox"/> | <input type="checkbox"/> | <input type="checkbox"/> | <input type="checkbox"/> | Tried to make me feel dependent on her/him                  | <input type="checkbox"/> | <input type="checkbox"/> | <input type="checkbox"/> | <input type="checkbox"/> |
| <input type="checkbox"/> | <input type="checkbox"/> | <input type="checkbox"/> | <input type="checkbox"/> | Felt I could not look after myself unless she/he was around | <input type="checkbox"/> | <input type="checkbox"/> | <input type="checkbox"/> | <input type="checkbox"/> |
| <input type="checkbox"/> | <input type="checkbox"/> | <input type="checkbox"/> | <input type="checkbox"/> | Gave me as much freedom as I wanted                         | <input type="checkbox"/> | <input type="checkbox"/> | <input type="checkbox"/> | <input type="checkbox"/> |
| <input type="checkbox"/> | <input type="checkbox"/> | <input type="checkbox"/> | <input type="checkbox"/> | Let me go out as often as I wanted                          | <input type="checkbox"/> | <input type="checkbox"/> | <input type="checkbox"/> | <input type="checkbox"/> |
| <input type="checkbox"/> | <input type="checkbox"/> | <input type="checkbox"/> | <input type="checkbox"/> | Was overprotective of me                                    | <input type="checkbox"/> | <input type="checkbox"/> | <input type="checkbox"/> | <input type="checkbox"/> |
| <input type="checkbox"/> | <input type="checkbox"/> | <input type="checkbox"/> | <input type="checkbox"/> | Did not praise me                                           | <input type="checkbox"/> | <input type="checkbox"/> | <input type="checkbox"/> | <input type="checkbox"/> |
| <input type="checkbox"/> | <input type="checkbox"/> | <input type="checkbox"/> | <input type="checkbox"/> | Let me dress in any way I pleased                           | <input type="checkbox"/> | <input type="checkbox"/> | <input type="checkbox"/> | <input type="checkbox"/> |

### SCHOOL CONNECTEDNESS SCALE

|                                       | Strongly disagree        | Disagree                 | Neutral                  | Agree                    | Strong agree             |
|---------------------------------------|--------------------------|--------------------------|--------------------------|--------------------------|--------------------------|
| I feel safe in my school              | <input type="checkbox"/> | <input type="checkbox"/> | <input type="checkbox"/> | <input type="checkbox"/> | <input type="checkbox"/> |
| I feel safe in my school              | <input type="checkbox"/> | <input type="checkbox"/> | <input type="checkbox"/> | <input type="checkbox"/> | <input type="checkbox"/> |
| I am happy to be at this school       | <input type="checkbox"/> | <input type="checkbox"/> | <input type="checkbox"/> | <input type="checkbox"/> | <input type="checkbox"/> |
| I feel like I am part of this school  | <input type="checkbox"/> | <input type="checkbox"/> | <input type="checkbox"/> | <input type="checkbox"/> | <input type="checkbox"/> |
| I feel close to people at this school | <input type="checkbox"/> | <input type="checkbox"/> | <input type="checkbox"/> | <input type="checkbox"/> | <input type="checkbox"/> |

### NEIGHBORHOOD ENVIRONMENT

|                                                                                                                                     |                                                                                                                                                                                                                                            |  |
|-------------------------------------------------------------------------------------------------------------------------------------|--------------------------------------------------------------------------------------------------------------------------------------------------------------------------------------------------------------------------------------------|--|
| How often do you experience fights, quarrel in your neighborhood?                                                                   | <input type="checkbox"/> Never<br><input type="checkbox"/> Sometimes (1-3 times/month)<br><input type="checkbox"/> Often ( $\geq 1$ time/week)                                                                                             |  |
| How often do you experience crime in your neighborhood?                                                                             | <input type="checkbox"/> Never<br><input type="checkbox"/> Sometimes (1-3 times/month)<br><input type="checkbox"/> Often ( $\geq 1$ time/week)                                                                                             |  |
| Which of the following behaviors do your peers have towards other people in your neighborhood?<br>(You can select multiple answers) | <input type="checkbox"/> Teasing makes others uncomfortable<br><input type="checkbox"/> Fighting<br><input type="checkbox"/> Swearing, slandering<br><input type="checkbox"/> Speaking out the secrets of others                           |  |
| What is the economic status of your neighborhood?                                                                                   | <input type="checkbox"/> Poor<br><input type="checkbox"/> Average<br><input type="checkbox"/> Rich                                                                                                                                         |  |
|                                                                                                                                     | <input type="checkbox"/> Threatening or forcing others to do something they don't want to do<br><input type="checkbox"/> Breaking friendships with others or forcing others to leave the group<br><input type="checkbox"/> None/Don't know |  |

### DEPRESSION

|                             |                                                      |                                                |                                                             |                                           |
|-----------------------------|------------------------------------------------------|------------------------------------------------|-------------------------------------------------------------|-------------------------------------------|
| <b>DURING THE PAST WEEK</b> | <b>Rarely or none of the time (less than 1 day )</b> | <b>Some or a little of the time (1-2 days)</b> | <b>Occasionally or a moderate amount of time (3-4 days)</b> | <b>Most or all of the time (5-7 days)</b> |
|-----------------------------|------------------------------------------------------|------------------------------------------------|-------------------------------------------------------------|-------------------------------------------|

|                                                                                      |                          |                          |                          |                          |
|--------------------------------------------------------------------------------------|--------------------------|--------------------------|--------------------------|--------------------------|
| I was bothered by things that usually don't bother me                                | <input type="checkbox"/> | <input type="checkbox"/> | <input type="checkbox"/> | <input type="checkbox"/> |
| I did not feel like eating; my appetite was poor                                     | <input type="checkbox"/> | <input type="checkbox"/> | <input type="checkbox"/> | <input type="checkbox"/> |
| I felt that I could not shake off the blues even with help from my family or friends | <input type="checkbox"/> | <input type="checkbox"/> | <input type="checkbox"/> | <input type="checkbox"/> |
| I felt I was just as good as other people                                            | <input type="checkbox"/> | <input type="checkbox"/> | <input type="checkbox"/> | <input type="checkbox"/> |
| I had trouble keeping my mind on what I was doing                                    | <input type="checkbox"/> | <input type="checkbox"/> | <input type="checkbox"/> | <input type="checkbox"/> |
| I felt depressed                                                                     | <input type="checkbox"/> | <input type="checkbox"/> | <input type="checkbox"/> | <input type="checkbox"/> |
| I felt that everything I did was an effort                                           | <input type="checkbox"/> | <input type="checkbox"/> | <input type="checkbox"/> | <input type="checkbox"/> |
| I felt hopeful about the future                                                      | <input type="checkbox"/> | <input type="checkbox"/> | <input type="checkbox"/> | <input type="checkbox"/> |
| I thought my life had been a failure                                                 | <input type="checkbox"/> | <input type="checkbox"/> | <input type="checkbox"/> | <input type="checkbox"/> |
| I felt fearful                                                                       | <input type="checkbox"/> | <input type="checkbox"/> | <input type="checkbox"/> | <input type="checkbox"/> |
| My sleep was restless                                                                | <input type="checkbox"/> | <input type="checkbox"/> | <input type="checkbox"/> | <input type="checkbox"/> |
| I was happy                                                                          | <input type="checkbox"/> | <input type="checkbox"/> | <input type="checkbox"/> | <input type="checkbox"/> |
| I talked less than usual                                                             | <input type="checkbox"/> | <input type="checkbox"/> | <input type="checkbox"/> | <input type="checkbox"/> |
| I felt lonely                                                                        | <input type="checkbox"/> | <input type="checkbox"/> | <input type="checkbox"/> | <input type="checkbox"/> |
| People were unfriendly                                                               | <input type="checkbox"/> | <input type="checkbox"/> | <input type="checkbox"/> | <input type="checkbox"/> |
| I enjoyed life                                                                       | <input type="checkbox"/> | <input type="checkbox"/> | <input type="checkbox"/> | <input type="checkbox"/> |
| I had crying spells                                                                  | <input type="checkbox"/> | <input type="checkbox"/> | <input type="checkbox"/> | <input type="checkbox"/> |
| I felt sad                                                                           | <input type="checkbox"/> | <input type="checkbox"/> | <input type="checkbox"/> | <input type="checkbox"/> |
| I felt that people dislike me                                                        | <input type="checkbox"/> | <input type="checkbox"/> | <input type="checkbox"/> | <input type="checkbox"/> |
| I could not get "going"                                                              | <input type="checkbox"/> | <input type="checkbox"/> | <input type="checkbox"/> | <input type="checkbox"/> |

### CYBERBULLYING SCALE

The following questions ask about your life in the **PAST FEW MONTHS**.

**Cyberbullying:** Any type of harassment or bullying (teasing, telling lies, making fun of someone, making rude or mean comments, spreading rumors, or making threatening or aggressive comments) that occurs through e-mail, a chat room, instant messaging, a website (including blogs), text messaging, or videos or pictures posted on websites or sent through cell phones.

|                                                                                              |                                                                                                                                                                                                                                                                        |                                                                                                                                                                                                                                |
|----------------------------------------------------------------------------------------------|------------------------------------------------------------------------------------------------------------------------------------------------------------------------------------------------------------------------------------------------------------------------|--------------------------------------------------------------------------------------------------------------------------------------------------------------------------------------------------------------------------------|
| Do other kids use any of the following to bully you?<br><br><b>(Select Multiple Answers)</b> | <input type="checkbox"/> Email<br><input type="checkbox"/> Online video clips of you<br><input type="checkbox"/> Text messages/Twitter<br><input type="checkbox"/> Picture messages<br><input type="checkbox"/> Instant messaging<br><input type="checkbox"/> Chatroom | <input type="checkbox"/> Social networking site (such as Facebook)<br><input type="checkbox"/> Virtual world (such as Second Life or the Sims)<br><input type="checkbox"/> Developed a mean website or message board about you |
| Do you use any of the following to bully other kids?<br><br><b>(Select Multiple Answers)</b> | <input type="checkbox"/> Email<br><input type="checkbox"/> Online video clips of you<br><input type="checkbox"/> Text messages/Twitter<br><input type="checkbox"/> Picture messages<br><input type="checkbox"/> Instant messaging<br><input type="checkbox"/> Chatroom | <input type="checkbox"/> Social networking site (such as Facebook)<br><input type="checkbox"/> Virtual world (such as Second Life or the Sims)<br><input type="checkbox"/> Developed a mean website or message board about you |

| PAST FEW MONTHS                                                                                                  | Never                    | Almost Never             | Sometimes                | Almost all the time      | All the time             |
|------------------------------------------------------------------------------------------------------------------|--------------------------|--------------------------|--------------------------|--------------------------|--------------------------|
| How often do you get online or text messages from another kid threatening to beat you up or hurt you physically? | <input type="checkbox"/> | <input type="checkbox"/> | <input type="checkbox"/> | <input type="checkbox"/> | <input type="checkbox"/> |

|                                                                                                                                                                                        |                          |                          |                          |                          |                          |
|----------------------------------------------------------------------------------------------------------------------------------------------------------------------------------------|--------------------------|--------------------------|--------------------------|--------------------------|--------------------------|
| How often do other kids leave you out of online groups on purpose?                                                                                                                     | <input type="checkbox"/> | <input type="checkbox"/> | <input type="checkbox"/> | <input type="checkbox"/> | <input type="checkbox"/> |
| How often does another kid say something mean to you (such as calling you names or making fun of you) in a text message or online?                                                     | <input type="checkbox"/> | <input type="checkbox"/> | <input type="checkbox"/> | <input type="checkbox"/> | <input type="checkbox"/> |
| How often does a kid who is mad at you try to get back at you by not letting you be in their online group anymore?                                                                     | <input type="checkbox"/> | <input type="checkbox"/> | <input type="checkbox"/> | <input type="checkbox"/> | <input type="checkbox"/> |
| How often do you get text or online messages that make you afraid for your safety?                                                                                                     | <input type="checkbox"/> | <input type="checkbox"/> | <input type="checkbox"/> | <input type="checkbox"/> | <input type="checkbox"/> |
| How often does a kid tell lies about you in texts or online to make other kids not like you anymore?                                                                                   | <input type="checkbox"/> | <input type="checkbox"/> | <input type="checkbox"/> | <input type="checkbox"/> | <input type="checkbox"/> |
| How often does another kid say online that they won't like you unless you do what they want you to do?                                                                                 | <input type="checkbox"/> | <input type="checkbox"/> | <input type="checkbox"/> | <input type="checkbox"/> | <input type="checkbox"/> |
| How often does a kid try to keep others from liking you by texting or posting mean things about you?                                                                                   | <input type="checkbox"/> | <input type="checkbox"/> | <input type="checkbox"/> | <input type="checkbox"/> | <input type="checkbox"/> |
| How often does another kid send you a message saying they will beat you up if you don't do what they want you to do?                                                                   | <input type="checkbox"/> | <input type="checkbox"/> | <input type="checkbox"/> | <input type="checkbox"/> | <input type="checkbox"/> |
| How often do you get in online fights?                                                                                                                                                 | <input type="checkbox"/> | <input type="checkbox"/> | <input type="checkbox"/> | <input type="checkbox"/> | <input type="checkbox"/> |
| How often does another kid put you down online by sending or posting cruel gossip, rumors, or something else hurtful?                                                                  | <input type="checkbox"/> | <input type="checkbox"/> | <input type="checkbox"/> | <input type="checkbox"/> | <input type="checkbox"/> |
| How often does another kid pretended to be you and send or post something that damages your reputation or friendships?                                                                 | <input type="checkbox"/> | <input type="checkbox"/> | <input type="checkbox"/> | <input type="checkbox"/> | <input type="checkbox"/> |
| How often does another kid share your personal secrets or images online without your permission?                                                                                       | <input type="checkbox"/> | <input type="checkbox"/> | <input type="checkbox"/> | <input type="checkbox"/> | <input type="checkbox"/> |
| How often have you had to ask an adult to help fix something bad that happened to you online (like a mean picture of you was posted, people called you names, someone threatened you)? | <input type="checkbox"/> | <input type="checkbox"/> | <input type="checkbox"/> | <input type="checkbox"/> | <input type="checkbox"/> |

**THANK YOU FOR PARTICIPATING IN THIS RESEARCH!**

## Vietnamese version

Những câu hỏi sau đây sẽ hỏi về các mối quan hệ trường lớp, cuộc sống gia đình, xã hội, những trải nghiệm liên quan đến bắt nạt trực tuyến và sức khỏe của chính bạn. Đây không phải là bài kiểm tra ở trường nên sẽ không có câu trả lời đúng sai. ĐỪNG CHO BẤT KỲ AI BIẾT ĐƯỢC NHỮNG CÂU TRẢ LỜI NÀY. CHÚNG TÔI SẼ GIỮ BÍ MẬT CHO NHỮNG CÂU TRẢ LỜI CỦA BẠN VÀ SẼ KHÔNG AI NHẬN RA BẠN QUA NHỮNG CÂU TRẢ LỜI. Hãy đọc những câu hỏi dưới đây và đánh dấu chọn vào câu trả lời phù hợp nhất với bạn.

### THÔNG TIN BẢN THÂN

|                                                                                                 |                                                                                                                                                                                                                                                                                                                                                                                                                                                                                                                                                                   |
|-------------------------------------------------------------------------------------------------|-------------------------------------------------------------------------------------------------------------------------------------------------------------------------------------------------------------------------------------------------------------------------------------------------------------------------------------------------------------------------------------------------------------------------------------------------------------------------------------------------------------------------------------------------------------------|
| Giới tính                                                                                       | <input type="checkbox"/> Nam <span style="margin-left: 150px;"><input type="checkbox"/> Nữ</span>                                                                                                                                                                                                                                                                                                                                                                                                                                                                 |
| Bạn hiện đang học lớp mấy?                                                                      | <input type="checkbox"/> Lớp 8 <input type="checkbox"/> Lớp 9 <input type="checkbox"/> Lớp 10 <input type="checkbox"/> Lớp 11 <input type="checkbox"/> Lớp 12                                                                                                                                                                                                                                                                                                                                                                                                     |
| Xếp loại học lực học kì gần nhất của bạn                                                        | <input type="checkbox"/> Kém <input type="checkbox"/> Yếu <input type="checkbox"/> Trung bình <input type="checkbox"/> Khá <input type="checkbox"/> Giỏi                                                                                                                                                                                                                                                                                                                                                                                                          |
| Mức độ thường xuyên truy cập Internet của bạn?                                                  | <input type="checkbox"/> Hàng ngày<br><input type="checkbox"/> Một vài lần/tuần <span style="margin-left: 100px;"><input type="checkbox"/> Rất hiếm khi</span><br><input type="checkbox"/> Một vài lần/tháng <span style="margin-left: 100px;"><input type="checkbox"/> Không bao giờ</span>                                                                                                                                                                                                                                                                      |
| Thời gian truy cập Internet trung bình MỖI NGÀY của bạn khoảng bao nhiêu?                       | <input type="checkbox"/> <2 giờ/ngày <input type="checkbox"/> 2-4 giờ/ngày <input type="checkbox"/> >4 giờ/ngày                                                                                                                                                                                                                                                                                                                                                                                                                                                   |
| Địa điểm mà bạn thường truy cập Internet?<br><br>(Có thể chọn nhiều câu trả lời)                | <input type="checkbox"/> Ở nhà trong phòng riêng<br><input type="checkbox"/> Ở nhà trong phòng khách khi không có ai<br><input type="checkbox"/> Ở nhà trong phòng khách khi có người thân<br><input type="checkbox"/> Nơi công cộng (quán net, ...)<br><input type="checkbox"/> Ở trường trong giờ học<br><input type="checkbox"/> Ở trường ngoài giờ học<br><input type="checkbox"/> Nơi khác (Ghi rõ): .....                                                                                                                                                   |
| Phương tiện mà bạn thường sử dụng nhất để truy cập Internet?<br>(Có thể chọn nhiều câu trả lời) | <input type="checkbox"/> Điện thoại di động<br><input type="checkbox"/> Máy tính bảng<br><input type="checkbox"/> Máy tính dùng chung<br><input type="checkbox"/> Máy tính cá nhân<br><input type="checkbox"/> Khác (Ghi rõ): .....                                                                                                                                                                                                                                                                                                                               |
| Bạn thường làm gì khi truy cập Internet?<br>(Có thể chọn nhiều câu trả lời)                     | <input type="checkbox"/> Truy cập các trang mạng xã hội (Facebook, Twitter, Youtube, ...)<br><input type="checkbox"/> Nói chuyện với người khác<br><input type="checkbox"/> Gửi thư điện tử<br><input type="checkbox"/> Tìm kiếm thông tin<br><input type="checkbox"/> Đọc tin tức<br><input type="checkbox"/> Học tập<br><input type="checkbox"/> Nghe nhạc<br><input type="checkbox"/> Xem phim<br><input type="checkbox"/> Mua sắm<br><input type="checkbox"/> Chơi game<br><input type="checkbox"/> Đăng ảnh<br><input type="checkbox"/> Khác (Ghi rõ): ..... |
| Hiện tại, bạn đang sống cùng ai?<br>(Có thể chọn nhiều câu trả lời)                             | <input type="checkbox"/> Sống cùng với cả cha và mẹ<br><input type="checkbox"/> Chỉ sống với cha/mẹ<br><input type="checkbox"/> Sống với họ hàng<br><input type="checkbox"/> Ở nhà trọ một mình<br><input type="checkbox"/> Khác (Ghi rõ): .....                                                                                                                                                                                                                                                                                                                  |

### SỬ DỤNG INTERNET

|                                                                                                    | Không bao giờ            | Hiếm khi                 | Thỉnh thoảng             | Thường xuyên             | Luôn luôn                |
|----------------------------------------------------------------------------------------------------|--------------------------|--------------------------|--------------------------|--------------------------|--------------------------|
| Bạn có thường nhận thấy mình truy cập internet (online) lâu hơn dự kiến?                           | <input type="checkbox"/> | <input type="checkbox"/> | <input type="checkbox"/> | <input type="checkbox"/> | <input type="checkbox"/> |
| Bạn có thường xao nhãng việc nhà để dành thời gian truy cập internet (online)?                     | <input type="checkbox"/> | <input type="checkbox"/> | <input type="checkbox"/> | <input type="checkbox"/> | <input type="checkbox"/> |
| Bạn có thường thích những trò tiêu khiển trên internet thay vì tương tác với người thân, bạn bè?   | <input type="checkbox"/> | <input type="checkbox"/> | <input type="checkbox"/> | <input type="checkbox"/> | <input type="checkbox"/> |
| Bạn có thường tạo những mối quan hệ mới với những người trên mạng?                                 | <input type="checkbox"/> | <input type="checkbox"/> | <input type="checkbox"/> | <input type="checkbox"/> | <input type="checkbox"/> |
| Những người xung quanh có thường than phiền về thời gian truy cập internet (online) của bạn không? | <input type="checkbox"/> | <input type="checkbox"/> | <input type="checkbox"/> | <input type="checkbox"/> | <input type="checkbox"/> |

|                                                                                                                             |                          |                          |                          |                          |                          |
|-----------------------------------------------------------------------------------------------------------------------------|--------------------------|--------------------------|--------------------------|--------------------------|--------------------------|
| Điểm số học tập hoặc công việc của bạn bị ảnh hưởng do việc sử dụng nhiều thời gian để truy cập internet (online) không?    | <input type="checkbox"/> | <input type="checkbox"/> | <input type="checkbox"/> | <input type="checkbox"/> | <input type="checkbox"/> |
| Bạn có thường kiểm tra email trước khi làm những việc khác trong ngày không?                                                | <input type="checkbox"/> | <input type="checkbox"/> | <input type="checkbox"/> | <input type="checkbox"/> | <input type="checkbox"/> |
| Việc học tập hoặc năng suất làm việc của bạn có thường bị ảnh hưởng bởi internet không?                                     | <input type="checkbox"/> | <input type="checkbox"/> | <input type="checkbox"/> | <input type="checkbox"/> | <input type="checkbox"/> |
| Bạn có thường cảm thấy đề phòng hay muốn giữ bí mật khi người khác hỏi về những việc bạn đã làm trên internet không?        | <input type="checkbox"/> | <input type="checkbox"/> | <input type="checkbox"/> | <input type="checkbox"/> | <input type="checkbox"/> |
| Bạn có thường thay thế những suy nghĩ lo âu trong cuộc sống bằng những suy nghĩ dễ chịu hơn về việc sử dụng internet không? | <input type="checkbox"/> | <input type="checkbox"/> | <input type="checkbox"/> | <input type="checkbox"/> | <input type="checkbox"/> |
| Bạn có thường mong đợi sẽ được tiếp tục truy cập internet?                                                                  | <input type="checkbox"/> | <input type="checkbox"/> | <input type="checkbox"/> | <input type="checkbox"/> | <input type="checkbox"/> |
| Bạn có cảm thấy nếu không có internet cuộc sống sẽ thật nhàm chán, trống rỗng và vô vị không?                               | <input type="checkbox"/> | <input type="checkbox"/> | <input type="checkbox"/> | <input type="checkbox"/> | <input type="checkbox"/> |
| Bạn có thường nổi cáu, la hét hoặc cư xử thô lỗ khi người khác làm gián đoạn lúc đang truy cập internet (online) không?     | <input type="checkbox"/> | <input type="checkbox"/> | <input type="checkbox"/> | <input type="checkbox"/> | <input type="checkbox"/> |
| Bạn có thường mất ngủ vì truy cập internet (online) khuya không?                                                            | <input type="checkbox"/> | <input type="checkbox"/> | <input type="checkbox"/> | <input type="checkbox"/> | <input type="checkbox"/> |
| Bạn có thường bận tâm tới internet khi không sử dụng hoặc tưởng tượng tới việc đang được truy cập internet (online) không?  | <input type="checkbox"/> | <input type="checkbox"/> | <input type="checkbox"/> | <input type="checkbox"/> | <input type="checkbox"/> |
| Bạn có tự nhủ “chỉ lên internet thêm vài phút nữa” không?                                                                   | <input type="checkbox"/> | <input type="checkbox"/> | <input type="checkbox"/> | <input type="checkbox"/> | <input type="checkbox"/> |
| Bạn có thường cố gắng giảm thời gian truy cập internet (online) nhưng thất bại không?                                       | <input type="checkbox"/> | <input type="checkbox"/> | <input type="checkbox"/> | <input type="checkbox"/> | <input type="checkbox"/> |
| Bạn có thường che giấu thời lượng truy cập internet (online) thực sự của mình không?                                        | <input type="checkbox"/> | <input type="checkbox"/> | <input type="checkbox"/> | <input type="checkbox"/> | <input type="checkbox"/> |
| Bạn có thường dành nhiều thời gian để truy cập internet (online) hơn là đi chơi với bạn bè không?                           | <input type="checkbox"/> | <input type="checkbox"/> | <input type="checkbox"/> | <input type="checkbox"/> | <input type="checkbox"/> |
| Bạn có cảm giác buồn chán, lo lắng khi không sử dụng internet và cảm giác này sẽ mất khi bạn sử dụng trở lại?               | <input type="checkbox"/> | <input type="checkbox"/> | <input type="checkbox"/> | <input type="checkbox"/> | <input type="checkbox"/> |

### SỰ GẮN KẾT VỚI CHA MẸ

Những câu dưới đây nói về thái độ và cư xử của cha (cha ruột/cha kế/cha nuôi), mẹ (mẹ ruột/mẹ kế/mẹ nuôi) đối với bạn trong cuộc sống hàng ngày.

Lưu ý:

- Với những bạn đang sống chung với CẢ cha (cha ruột/cha kế/cha nuôi) và mẹ (mẹ ruột/mẹ kế/mẹ nuôi) thì làm CẢ hai phần: ĐỐI VỚI CHA và ĐỐI VỚI MẸ
- Với những bạn CHỈ đang sống chung với cha (cha ruột/cha kế/cha nuôi) thì làm phần ĐỐI VỚI CHA
- Với những bạn CHỈ đang sống chung với mẹ (mẹ ruột/mẹ kế/mẹ nuôi) thì làm phần ĐỐI VỚI MẸ
- Với những bạn đang KHÔNG sống chung với cha (cha ruột/cha kế/cha nuôi) và mẹ (mẹ ruột/mẹ kế/mẹ nuôi) thì KHÔNG làm cả hai phần ĐỐI VỚI CHA và ĐỐI VỚI MẸ. Mời bạn chuyển sang phần kế tiếp để tiếp tục trả lời.

| ĐỐI VỚI CHA              |                          |                          |                          | NỘI DUNG                                      | ĐỐI VỚI MẸ               |                          |                          |                          |
|--------------------------|--------------------------|--------------------------|--------------------------|-----------------------------------------------|--------------------------|--------------------------|--------------------------|--------------------------|
| Rất đúng                 | Gần đúng                 | Gần sai                  | Rất sai                  |                                               | Rất sai                  | Gần sai                  | Gần đúng                 | Rất đúng                 |
| <input type="checkbox"/> | <input type="checkbox"/> | <input type="checkbox"/> | <input type="checkbox"/> | Nói chuyện với tôi một cách ấm áp, thân thiện | <input type="checkbox"/> | <input type="checkbox"/> | <input type="checkbox"/> | <input type="checkbox"/> |
| <input type="checkbox"/> | <input type="checkbox"/> | <input type="checkbox"/> | <input type="checkbox"/> | Không giúp đỡ tôi nhiều như tôi mong          | <input type="checkbox"/> | <input type="checkbox"/> | <input type="checkbox"/> | <input type="checkbox"/> |
| <input type="checkbox"/> | <input type="checkbox"/> | <input type="checkbox"/> | <input type="checkbox"/> | Để tôi làm điều tôi thích                     | <input type="checkbox"/> | <input type="checkbox"/> | <input type="checkbox"/> | <input type="checkbox"/> |
| <input type="checkbox"/> | <input type="checkbox"/> | <input type="checkbox"/> | <input type="checkbox"/> | Tỏ ra lạnh nhạt với tôi                       | <input type="checkbox"/> | <input type="checkbox"/> | <input type="checkbox"/> | <input type="checkbox"/> |
| <input type="checkbox"/> | <input type="checkbox"/> | <input type="checkbox"/> | <input type="checkbox"/> | Tỏ ra hiểu những vấn đề tôi nói               | <input type="checkbox"/> | <input type="checkbox"/> | <input type="checkbox"/> | <input type="checkbox"/> |

|                          |                          |                          |                          |                                                     |                          |                          |                          |                          |
|--------------------------|--------------------------|--------------------------|--------------------------|-----------------------------------------------------|--------------------------|--------------------------|--------------------------|--------------------------|
| <input type="checkbox"/> | <input type="checkbox"/> | <input type="checkbox"/> | <input type="checkbox"/> | Thái độ trìu mến với tôi                            | <input type="checkbox"/> | <input type="checkbox"/> | <input type="checkbox"/> | <input type="checkbox"/> |
| <input type="checkbox"/> | <input type="checkbox"/> | <input type="checkbox"/> | <input type="checkbox"/> | Để tôi tự đưa ra quyết định                         | <input type="checkbox"/> | <input type="checkbox"/> | <input type="checkbox"/> | <input type="checkbox"/> |
| <input type="checkbox"/> | <input type="checkbox"/> | <input type="checkbox"/> | <input type="checkbox"/> | Không muốn tôi trưởng thành quá nhanh (bảo bọc)     | <input type="checkbox"/> | <input type="checkbox"/> | <input type="checkbox"/> | <input type="checkbox"/> |
| <input type="checkbox"/> | <input type="checkbox"/> | <input type="checkbox"/> | <input type="checkbox"/> | Cố gắng kiểm soát những việc tôi làm                | <input type="checkbox"/> | <input type="checkbox"/> | <input type="checkbox"/> | <input type="checkbox"/> |
| <input type="checkbox"/> | <input type="checkbox"/> | <input type="checkbox"/> | <input type="checkbox"/> | Không cho tôi sự riêng tư và bí mật                 | <input type="checkbox"/> | <input type="checkbox"/> | <input type="checkbox"/> | <input type="checkbox"/> |
| <input type="checkbox"/> | <input type="checkbox"/> | <input type="checkbox"/> | <input type="checkbox"/> | Thường hay chỉ bảo tôi quá nhiều                    | <input type="checkbox"/> | <input type="checkbox"/> | <input type="checkbox"/> | <input type="checkbox"/> |
| <input type="checkbox"/> | <input type="checkbox"/> | <input type="checkbox"/> | <input type="checkbox"/> | Hay mỉm cười với tôi                                | <input type="checkbox"/> | <input type="checkbox"/> | <input type="checkbox"/> | <input type="checkbox"/> |
| <input type="checkbox"/> | <input type="checkbox"/> | <input type="checkbox"/> | <input type="checkbox"/> | Hay xem tôi như trẻ con                             | <input type="checkbox"/> | <input type="checkbox"/> | <input type="checkbox"/> | <input type="checkbox"/> |
| <input type="checkbox"/> | <input type="checkbox"/> | <input type="checkbox"/> | <input type="checkbox"/> | Không hiểu những gì tôi cần và tôi muốn             | <input type="checkbox"/> | <input type="checkbox"/> | <input type="checkbox"/> | <input type="checkbox"/> |
| <input type="checkbox"/> | <input type="checkbox"/> | <input type="checkbox"/> | <input type="checkbox"/> | Để tôi quyết định những việc của bản thân           | <input type="checkbox"/> | <input type="checkbox"/> | <input type="checkbox"/> | <input type="checkbox"/> |
| <input type="checkbox"/> | <input type="checkbox"/> | <input type="checkbox"/> | <input type="checkbox"/> | Khiến tôi cảm thấy không ai cần đến tôi             | <input type="checkbox"/> | <input type="checkbox"/> | <input type="checkbox"/> | <input type="checkbox"/> |
| <input type="checkbox"/> | <input type="checkbox"/> | <input type="checkbox"/> | <input type="checkbox"/> | Làm tôi cảm thấy tốt hơn khi tôi đang khó chịu      | <input type="checkbox"/> | <input type="checkbox"/> | <input type="checkbox"/> | <input type="checkbox"/> |
| <input type="checkbox"/> | <input type="checkbox"/> | <input type="checkbox"/> | <input type="checkbox"/> | Ít khi nói chuyện với tôi                           | <input type="checkbox"/> | <input type="checkbox"/> | <input type="checkbox"/> | <input type="checkbox"/> |
| <input type="checkbox"/> | <input type="checkbox"/> | <input type="checkbox"/> | <input type="checkbox"/> | Khiến tôi cảm thấy bị phụ thuộc nhiều               | <input type="checkbox"/> | <input type="checkbox"/> | <input type="checkbox"/> | <input type="checkbox"/> |
| <input type="checkbox"/> | <input type="checkbox"/> | <input type="checkbox"/> | <input type="checkbox"/> | Khiến tôi cảm thấy không thể tự chăm sóc mình       | <input type="checkbox"/> | <input type="checkbox"/> | <input type="checkbox"/> | <input type="checkbox"/> |
| <input type="checkbox"/> | <input type="checkbox"/> | <input type="checkbox"/> | <input type="checkbox"/> | Cho tôi nhiều tự do                                 | <input type="checkbox"/> | <input type="checkbox"/> | <input type="checkbox"/> | <input type="checkbox"/> |
| <input type="checkbox"/> | <input type="checkbox"/> | <input type="checkbox"/> | <input type="checkbox"/> | Cho tôi đi ra ngoài đường thường xuyên như tôi muốn | <input type="checkbox"/> | <input type="checkbox"/> | <input type="checkbox"/> | <input type="checkbox"/> |
| <input type="checkbox"/> | <input type="checkbox"/> | <input type="checkbox"/> | <input type="checkbox"/> | Thường tỏ ra quá bảo vệ tôi                         | <input type="checkbox"/> | <input type="checkbox"/> | <input type="checkbox"/> | <input type="checkbox"/> |
| <input type="checkbox"/> | <input type="checkbox"/> | <input type="checkbox"/> | <input type="checkbox"/> | Ít khen ngợi tôi                                    | <input type="checkbox"/> | <input type="checkbox"/> | <input type="checkbox"/> | <input type="checkbox"/> |
| <input type="checkbox"/> | <input type="checkbox"/> | <input type="checkbox"/> | <input type="checkbox"/> | Để tôi mặc theo cách tôi thích                      | <input type="checkbox"/> | <input type="checkbox"/> | <input type="checkbox"/> | <input type="checkbox"/> |

### SỰ GẮN KẾT VỚI TRƯỜNG LỚP

|                                                      | Hoàn toàn không đồng ý   | Không đồng ý             | Không biết               | Đồng ý                   | Hoàn toàn đồng ý         |
|------------------------------------------------------|--------------------------|--------------------------|--------------------------|--------------------------|--------------------------|
| Tôi cảm thấy an toàn ở trường tôi                    | <input type="checkbox"/> | <input type="checkbox"/> | <input type="checkbox"/> | <input type="checkbox"/> | <input type="checkbox"/> |
| Giáo viên trong trường đối xử công bằng với học sinh | <input type="checkbox"/> | <input type="checkbox"/> | <input type="checkbox"/> | <input type="checkbox"/> | <input type="checkbox"/> |
| Tôi thấy vui khi học tại trường này                  | <input type="checkbox"/> | <input type="checkbox"/> | <input type="checkbox"/> | <input type="checkbox"/> | <input type="checkbox"/> |
| Tôi rất thích là học sinh của trường này             | <input type="checkbox"/> | <input type="checkbox"/> | <input type="checkbox"/> | <input type="checkbox"/> | <input type="checkbox"/> |
| Tôi cảm thấy gần gũi với mọi người trong trường      | <input type="checkbox"/> | <input type="checkbox"/> | <input type="checkbox"/> | <input type="checkbox"/> | <input type="checkbox"/> |

### MÔI TRƯỜNG SỐNG VÀ TRẢI NGHIỆM BẠO LỰC

|                                                                                                                                    |                                                                                                                                                                                                                                                                                                                                                                                                                                         |
|------------------------------------------------------------------------------------------------------------------------------------|-----------------------------------------------------------------------------------------------------------------------------------------------------------------------------------------------------------------------------------------------------------------------------------------------------------------------------------------------------------------------------------------------------------------------------------------|
| Khu vực bạn đang sống có xảy ra đánh nhau, cãi nhau không?                                                                         | <input type="checkbox"/> Chưa bao giờ<br><input type="checkbox"/> Thỉnh thoảng (1-3 lần/tháng)<br><input type="checkbox"/> Thường xuyên (ít nhất 1 lần/tuần)                                                                                                                                                                                                                                                                            |
| Khu vực bạn đang sống có xảy ra các tệ nạn như trộm cắp, cướp của, cờ bạc...                                                       | <input type="checkbox"/> Chưa bao giờ<br><input type="checkbox"/> Thỉnh thoảng (1-3 lần/tháng)<br><input type="checkbox"/> Thường xuyên (ít nhất 1 lần/tuần)                                                                                                                                                                                                                                                                            |
| Những người bạn trong xóm/cùng nhà trọ của bạn có hành vi nào sau đây đối với những người khác?<br>(Có thể chọn nhiều câu trả lời) | <input type="checkbox"/> Trêu chọc làm người khác khó chịu<br><input type="checkbox"/> Đánh nhau<br><input type="checkbox"/> Chửi mắng, nói xấu.<br><input type="checkbox"/> Nói ra bí mật của người khác<br><input type="checkbox"/> Đe dọa hoặc bắt người khác làm điều họ không muốn.<br><input type="checkbox"/> Phá vỡ tình bạn của người khác hoặc buộc người khác rời khỏi nhóm.<br><input type="checkbox"/> Không có/Không biết |
| Hầu hết hàng xóm khu vực nhà bạn có đời sống kinh tế như thế nào?                                                                  | <input type="checkbox"/> Nghèo<br><input type="checkbox"/> Trung bình – Khá                                                                                                                                                                                                                                                                                                                                                             |



Giàu**TRẦM CẢM**

| <b>TRONG TUẦN VỪA QUA</b>                                                | <b>Hiếm khi (&lt;1 ngày)</b> | <b>Một vài lần (1-2 ngày)</b> | <b>Thỉnh thoảng (3-4 ngày)</b> | <b>Hầu hết thời gian (5-7 ngày)</b> |
|--------------------------------------------------------------------------|------------------------------|-------------------------------|--------------------------------|-------------------------------------|
| Tôi dễ bực bội vì những điều thường ngày không gây bực cho tôi           | <input type="checkbox"/>     | <input type="checkbox"/>      | <input type="checkbox"/>       | <input type="checkbox"/>            |
| Tôi cảm thấy không muốn ăn và ăn không thấy ngon                         | <input type="checkbox"/>     | <input type="checkbox"/>      | <input type="checkbox"/>       | <input type="checkbox"/>            |
| Tôi cảm thấy không thể quên nỗi buồn mặc dù gia đình, bạn bè giúp đỡ tôi | <input type="checkbox"/>     | <input type="checkbox"/>      | <input type="checkbox"/>       | <input type="checkbox"/>            |
| Tôi cảm thấy tôi là người tốt (khỏe mạnh) như những người khác           | <input type="checkbox"/>     | <input type="checkbox"/>      | <input type="checkbox"/>       | <input type="checkbox"/>            |
| Tôi hay quên những việc tôi đang làm                                     | <input type="checkbox"/>     | <input type="checkbox"/>      | <input type="checkbox"/>       | <input type="checkbox"/>            |
| Tôi cảm thấy bị trầm cảm                                                 | <input type="checkbox"/>     | <input type="checkbox"/>      | <input type="checkbox"/>       | <input type="checkbox"/>            |
| Tôi thấy mọi việc tôi làm là sai                                         | <input type="checkbox"/>     | <input type="checkbox"/>      | <input type="checkbox"/>       | <input type="checkbox"/>            |
| Tôi cảm thấy tràn đầy hi vọng về tương lai                               | <input type="checkbox"/>     | <input type="checkbox"/>      | <input type="checkbox"/>       | <input type="checkbox"/>            |
| Tôi cảm thấy cuộc đời tôi đã từng thất bại                               | <input type="checkbox"/>     | <input type="checkbox"/>      | <input type="checkbox"/>       | <input type="checkbox"/>            |
| Tôi thấy sợ hãi                                                          | <input type="checkbox"/>     | <input type="checkbox"/>      | <input type="checkbox"/>       | <input type="checkbox"/>            |
| Tôi ngủ không yên giấc                                                   | <input type="checkbox"/>     | <input type="checkbox"/>      | <input type="checkbox"/>       | <input type="checkbox"/>            |
| Tôi vui vẻ                                                               | <input type="checkbox"/>     | <input type="checkbox"/>      | <input type="checkbox"/>       | <input type="checkbox"/>            |
| Tôi nói chuyện ít hơn bình thường                                        | <input type="checkbox"/>     | <input type="checkbox"/>      | <input type="checkbox"/>       | <input type="checkbox"/>            |
| Tôi cảm thấy cô đơn                                                      | <input type="checkbox"/>     | <input type="checkbox"/>      | <input type="checkbox"/>       | <input type="checkbox"/>            |
| Mọi người không thân thiện với tôi                                       | <input type="checkbox"/>     | <input type="checkbox"/>      | <input type="checkbox"/>       | <input type="checkbox"/>            |
| Tôi yêu thích cuộc sống hiện tại                                         | <input type="checkbox"/>     | <input type="checkbox"/>      | <input type="checkbox"/>       | <input type="checkbox"/>            |
| Tôi khóc nhiều lần                                                       | <input type="checkbox"/>     | <input type="checkbox"/>      | <input type="checkbox"/>       | <input type="checkbox"/>            |
| Tôi thấy buồn                                                            | <input type="checkbox"/>     | <input type="checkbox"/>      | <input type="checkbox"/>       | <input type="checkbox"/>            |
| Tôi cảm thấy mọi người ghét tôi                                          | <input type="checkbox"/>     | <input type="checkbox"/>      | <input type="checkbox"/>       | <input type="checkbox"/>            |
| Tôi không thể tiếp tục mọi việc như bình thường được nữa                 | <input type="checkbox"/>     | <input type="checkbox"/>      | <input type="checkbox"/>       | <input type="checkbox"/>            |

**BẮT NẠT TRỰC TUYẾN**

Những câu dưới đây hỏi về tình trạng bị bắt nạt trực tuyến trong cuộc sống của bạn **MỘT VÀI THÁNG QUA**. Bị bắt nạt trực tuyến: là bất kỳ loại quấy rối nào như trêu ghẹo, bịa chuyện, châm chọc, đưa ra bình luận thô lỗ, xúc phạm, truyền bá tin đồn, hoặc đưa ra các lời đe dọa, cảnh cáo xảy ra thông qua email, phòng chat, nhắn tin qua mạng, trang web (bao gồm cả blog) hoặc tin nhắn điện thoại.

|                                                                                                                             |                                                                                                                                                                                                                                                                                                                                                                                                                                                                                                                                                                |
|-----------------------------------------------------------------------------------------------------------------------------|----------------------------------------------------------------------------------------------------------------------------------------------------------------------------------------------------------------------------------------------------------------------------------------------------------------------------------------------------------------------------------------------------------------------------------------------------------------------------------------------------------------------------------------------------------------|
| Những bạn khác có sử dụng bất kỳ hình thức nào dưới đây để bắt nạt bạn hay không?<br><b>(Có thể chọn nhiều câu trả lời)</b> | <input type="checkbox"/> Email<br><input type="checkbox"/> Đăng phim ghi hình của bạn<br><input type="checkbox"/> Tin nhắn điện thoại/Twitter<br><input type="checkbox"/> Trang mạng xã hội (Facebook, ...)<br><input type="checkbox"/> Tin nhắn hình ảnh<br><input type="checkbox"/> Nhóm chat<br><input type="checkbox"/> Nhắn tin qua mạng<br><input type="checkbox"/> Trò chơi thực tế ảo (ví dụ như Second Life hoặc The Sims)<br><input type="checkbox"/> Tạo ra một trang web hoặc diễn đàn trực tuyến nói xấu bạn<br><input type="checkbox"/> Không có |
| Bạn có sử dụng bất kỳ hình thức nào dưới đây để bắt nạt các bạn khác hay không?<br><b>(Có thể chọn nhiều câu trả lời)</b>   | <input type="checkbox"/> Email<br><input type="checkbox"/> Đăng phim ghi hình của bạn<br><input type="checkbox"/> Tin nhắn điện thoại/Twitter<br><input type="checkbox"/> Trang mạng xã hội (Facebook, ...)<br><input type="checkbox"/> Tin nhắn hình ảnh                                                                                                                                                                                                                                                                                                      |

- Nhóm chat
- Nhắn tin qua mạng
- Trò chơi thực tế ảo (ví dụ như Second Life hoặc The Sims)
- Tạo ra một trang web hoặc diễn đàn trực tuyến nói xấu bạn
- Không có

| <b>TRONG VÀI THÁNG QUA</b>                                                                                                                                                                                         | <b>Không bao giờ</b>     | <b>Gần như không</b>     | <b>Thỉnh thoảng</b>      | <b>Gần như thường xuyên</b> | <b>Luôn luôn</b>         |
|--------------------------------------------------------------------------------------------------------------------------------------------------------------------------------------------------------------------|--------------------------|--------------------------|--------------------------|-----------------------------|--------------------------|
| Bạn có thường nhận được tin nhắn điện thoại/qua mạng từ bạn khác có nội dung dọa đánh hay làm tổn thương bạn về thể chất không?                                                                                    | <input type="checkbox"/> | <input type="checkbox"/> | <input type="checkbox"/> | <input type="checkbox"/>    | <input type="checkbox"/> |
| Những bạn khác có thường cố ý tẩy chay bạn trong các nhóm/cộng đồng trên mạng không?                                                                                                                               | <input type="checkbox"/> | <input type="checkbox"/> | <input type="checkbox"/> | <input type="checkbox"/>    | <input type="checkbox"/> |
| Những bạn khác có thường nói những điều không tốt về bạn (ví dụ như đặt biệt danh hoặc đem bạn ra làm trò đùa) bằng tin nhắn điện thoại/qua mạng không?                                                            | <input type="checkbox"/> | <input type="checkbox"/> | <input type="checkbox"/> | <input type="checkbox"/>    | <input type="checkbox"/> |
| Nếu một người bạn khác tức giận với bạn, người đó có trả đũa bạn bằng cách không để bạn tham gia nhóm bạn bè trên mạng của họ nữa hay không?                                                                       | <input type="checkbox"/> | <input type="checkbox"/> | <input type="checkbox"/> | <input type="checkbox"/>    | <input type="checkbox"/> |
| Bạn có thường nhận được tin nhắn điện thoại/qua mạng khiến bạn lo lắng về sự an toàn của bạn không?                                                                                                                | <input type="checkbox"/> | <input type="checkbox"/> | <input type="checkbox"/> | <input type="checkbox"/>    | <input type="checkbox"/> |
| Bạn có thường bị một người bạn khác dùng tin nhắn điện thoại/qua mạng để nói sai sự thật về bạn làm cho những người bạn khác không còn thích bạn nữa không?                                                        | <input type="checkbox"/> | <input type="checkbox"/> | <input type="checkbox"/> | <input type="checkbox"/>    | <input type="checkbox"/> |
| Bạn có thường bị một người bạn khác nói trên mạng là họ sẽ không thích bạn trừ khi bạn làm theo những gì họ muốn không?                                                                                            | <input type="checkbox"/> | <input type="checkbox"/> | <input type="checkbox"/> | <input type="checkbox"/>    | <input type="checkbox"/> |
| Bạn có thường bị một người bạn khác sử dụng tin nhắn hoặc bài đăng để nói xấu về bạn và khiến những người khác không thích bạn không?                                                                              | <input type="checkbox"/> | <input type="checkbox"/> | <input type="checkbox"/> | <input type="checkbox"/>    | <input type="checkbox"/> |
| Bạn có thường bị một người bạn khác gửi tin nhắn với nội dung dọa đánh nếu như bạn không làm theo những gì họ muốn không?                                                                                          | <input type="checkbox"/> | <input type="checkbox"/> | <input type="checkbox"/> | <input type="checkbox"/>    | <input type="checkbox"/> |
| Bạn có thường bị vướng vào xung đột trên mạng không?                                                                                                                                                               | <input type="checkbox"/> | <input type="checkbox"/> | <input type="checkbox"/> | <input type="checkbox"/>    | <input type="checkbox"/> |
| Những người bạn khác có thường làm bạn xấu hổ trên mạng bằng cách gửi hoặc đăng những lời bần tán, tin đồn cay nghiệt, hoặc những thông tin khác khiến bạn bị tổn thương không?                                    | <input type="checkbox"/> | <input type="checkbox"/> | <input type="checkbox"/> | <input type="checkbox"/>    | <input type="checkbox"/> |
| Những người bạn khác có thường giả mạo bạn để gửi hoặc đăng thông tin gây tổn hại đến danh dự hoặc các mối quan hệ bạn bè của bạn không?                                                                           | <input type="checkbox"/> | <input type="checkbox"/> | <input type="checkbox"/> | <input type="checkbox"/>    | <input type="checkbox"/> |
| Những người bạn khác có thường chia sẻ bí mật hoặc hình ảnh cá nhân của bạn lên mạng mà không có sự đồng ý của bạn không?                                                                                          | <input type="checkbox"/> | <input type="checkbox"/> | <input type="checkbox"/> | <input type="checkbox"/>    | <input type="checkbox"/> |
| Bạn có thường phải nhờ người lớn giải quyết những tình huống xấu xảy ra với bạn trên mạng không (ví dụ như một bức ảnh không tốt của bạn bị đăng lên mạng, mọi người gọi bạn bằng biệt danh, có ai đó đe dọa bạn?) | <input type="checkbox"/> | <input type="checkbox"/> | <input type="checkbox"/> | <input type="checkbox"/>    | <input type="checkbox"/> |

**XIN CHÂN THÀNH CẢM ƠN BẠN ĐÃ THAM GIA NGHIÊN CỨU!**
